# Supplementary material for: A Fondazione Italiana Linfomi cohort study of R-COMP vs R-CHOP in older patients with diffuse large B-cell lymphoma
Source: PubMed Central journal article supplement — Blood Adv. 2023 Jun 6;7(15):4160–9. doi: 10.1182/bloodadvances.2023009839 (PMC10407138; doi:10.1182/bloodadvances.2023009839), 2023-06-06

Figure S1. Overall survival of patients treated with full-dose R-CHOP/R-COMP vs reduced/palliative dose (RD/PD).

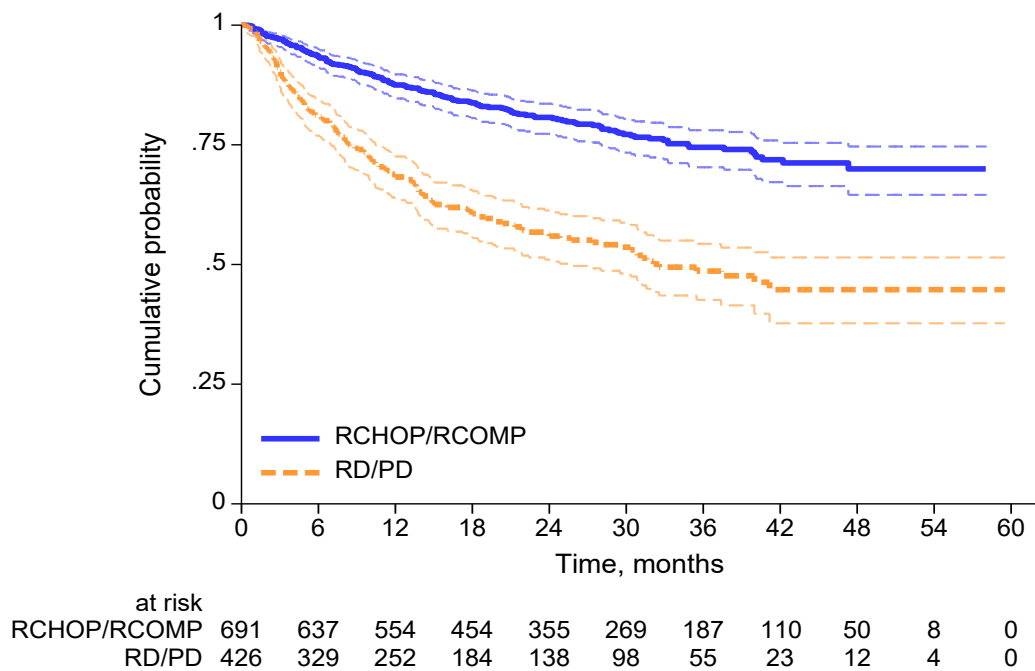

**Table S1.** Hazard ratio (HR) between R-COMP vs R-CHOP in raw data and adjusted by prognostic factors

| R-COMP vs R-CHOP – OS              | N   | HR   | 95%CI     | p-value |
|------------------------------------|-----|------|-----------|---------|
| Raw data                           | 691 | 1.36 | 0.99-1.87 | 0.059   |
| Adjusted by sGA score              | 691 | 1.12 | 0.79-1.58 | 0.514   |
| Adjusted by cardiac risk factor    | 691 | 1.26 | 0.90-1.75 | 0.175   |
| Adjusted by EPI score              | 648 | 1.10 | 0.78-1.56 | 0.582   |
| Adjusted in multivariable analysis | 643 | 1.06 | 0.74-1.52 | 0.753   |

Multivariable Cox regression: adjusted by EPI + cardiac risk factor + B-symptoms + Bulky disease

| R-COMP vs R-CHOP – PFS             | N   | HR   | 95%CI     | p-value |
|------------------------------------|-----|------|-----------|---------|
| Raw data                           | 691 | 1.30 | 0.99-1.71 | 0.059   |
| Adjusted by sGA score              | 691 | 1.12 | 0.79-1.58 | 0.514   |
| Adjusted by cardiac risk factor    | 691 | 1.25 | 0.94-1.66 | 0.124   |
| Adjusted by EPI score              | 648 | 1.11 | 0.83-1.49 | 0.475   |
| Adjusted in multivariable analysis | 643 | 1.11 | 0.82-1.50 | 0.512   |

Multivariable Cox regression: adjusted by EPI + cardiac risk factor + B symptoms + bulky disease

**Table S2.** Hazard ratio (HR) between R-COMP vs R-CHOP in raw data and adjusted by prognostic factors in cohort selected for inverse probability weight (IPW) Cox regression.

| R-COMP vs R-CHOP - OS           | HR   | 95%CI     | p-value |
|---------------------------------|------|-----------|---------|
| Raw data                        | 1.44 | 1.03-2.01 | 0.031   |
| Adjusted by sGA score           | 1.19 | 0.83-1.71 | 0.335   |
| Adjusted by cardiac risk factor | 1.33 | 0.94-1.88 | 0.102   |
| Adjusted by EPI score           | 1.13 | 0.80-1.59 | 0.500   |

|                                  |      |           |       |
|----------------------------------|------|-----------|-------|
| Inverse probability weight (IPW) | 1.01 | 0.68-1.50 | 0.948 |
|----------------------------------|------|-----------|-------|

| R-COMP vs R-CHOP – PFS           | HR   | 95%CI     | p-value |
|----------------------------------|------|-----------|---------|
| Raw data                         | 1.38 | 1.04-1.84 | 0.026   |
| Adjusted by sGA score            | 1.25 | 0.93-1.70 | 0.145   |
| Adjusted by cardiac risk factor  | 1.33 | 0.99-1.78 | 0.062   |
| Adjusted by EPI score            | 1.11 | 0.83-1.49 | 0.475   |
| Inverse probability weight (IPW) | 1.30 | 0.92-1.85 | 0.142   |

Cohort of 643 patients: in overall survival (OS) 138 events, in progression-free survival (PFS) 188 events.

Figure S2: Check of balancing covariates between R-CHOP/R-COMP before (unadjusted) and after (adjusted) IPW

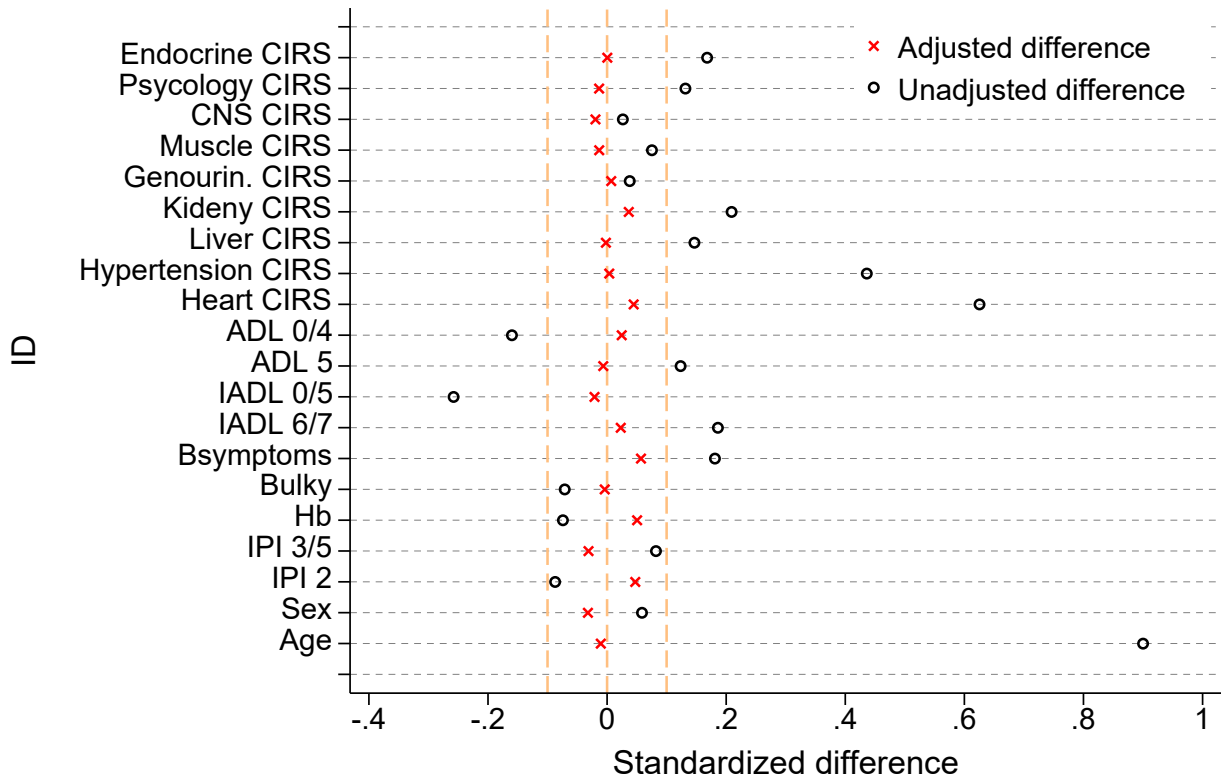

Supplement: BLOODA_ADV-2023-009839-mmc1.pdf [file BLOODA_ADV-2023-009839-mmc1.pdf]
